# Supplementary material for: A family of dinuclear lanthanide(iii) complexes from the use of a tridentate Schiff base
Source: Royal Society of Chemistry journal article supplement (doi:10.1039/c5dt01218j), 2015-01-01
Supplement: c5dt01218j1.pdf [file c5dt01218j1.pdf]

## ELECTRONIC SUPPLEMENTARY INFORMATION

to

### **A family of dinuclear lanthanide(III) complexes from the use of a tridentate Schiff base: structural and physical studies, and the case of a Dy<sup>III</sup><sub>2</sub> emissive single-molecule magnet†**

Nikolaos C. Anastasiadis,<sup>a</sup> Dimitris A. Kalofolias,<sup>b</sup> Aggelos Philippidis,<sup>c</sup> Sofia Tzani,<sup>d</sup> Catherine P. Raptopoulou,<sup>d</sup> Vassilis Psycharis,<sup>d</sup> Constantinos J. Milios,<sup>\*b</sup> Albert Escuer<sup>\*e</sup> and Spyros P. Perlepes<sup>\*a,f</sup>

<sup>a</sup> Department of Chemistry, University of Patras, 265 04 Patras, Greece.

E-mail: [perlepes@patreas.upatras.gr](mailto:perlepes@patreas.upatras.gr); Tel: +30 2610 996730

<sup>b</sup> Department of Chemistry, University of Crete, Voutes, 710 03 Herakleion, Greece.

E-mail: [komil@chemistry.uoc.gr](mailto:komil@chemistry.uoc.gr); Tel: +30 2810 545099

<sup>c</sup> Institute of Electronic Structure and Laser, Foundation for Research and Technology- Hellas (IESL-FORTH), P.O. Box 1385, 711 10 Herakleion, Greece.

<sup>d</sup> Institute of Nanoscience and Nanotechnology, NCSR “Demokritos”, 153 10 Aghia Paraskevi Attikis, Greece.

<sup>e</sup> Departament de Química Inorgànica, Universitat de Barcelona, Diagonal 645, 08028 Barcelona, Spain. E-mail: [albert.escuer@ub.edu](mailto:albert.escuer@ub.edu); Tel: +34 93 4039138

<sup>f</sup> Institute of Chemical Engineering Sciences, Foundation for Research and Technology-Hellas (FORTH/ICE-HT), Platani, P.O. Box 1414, 265 04 Patras, Greece.

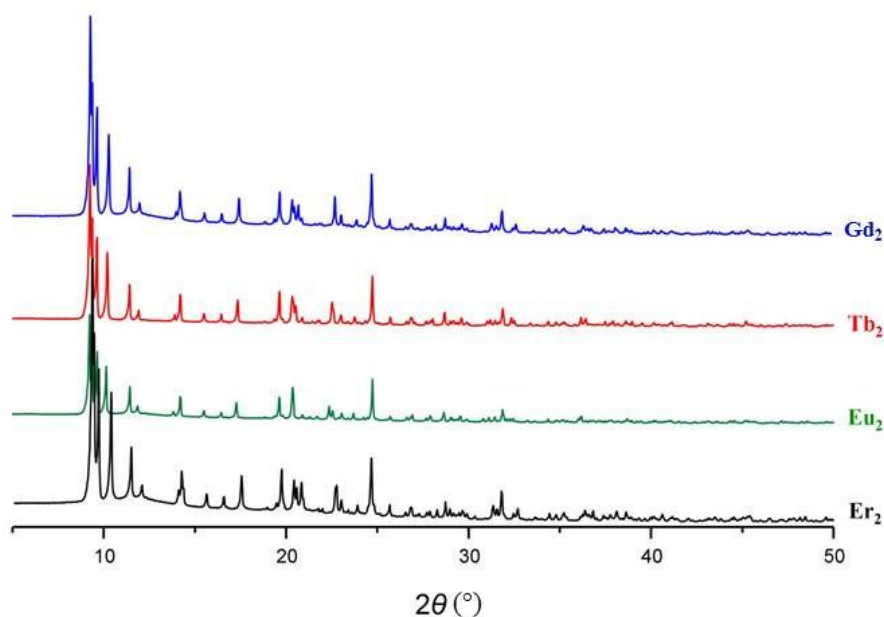

**Fig. S1** Powder XRD diagrams' comparison between the representative  $\text{Eu}^{\text{III}}_2$  (**2**),  $\text{Gd}^{\text{III}}_2$  (**3**),  $\text{Tb}^{\text{III}}_2$  (**4**) and  $\text{Er}^{\text{III}}_2$  (**7**) complexes. The experimental pattern of the  $\text{Gd}^{\text{III}}_2$  complex **3** shown above is identical with the theoretical diagram for this complex and for the  $\text{Dy}^{\text{III}}_2$  complex **5** (the structures of **3** and **5** were solved by single-crystal, X-ray crystallography).

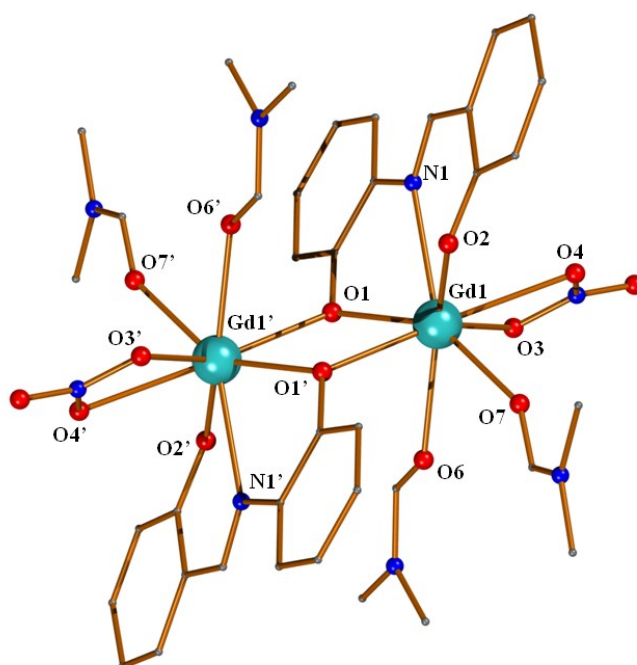

**Fig. S2** Partially labelled plot of the molecular structure of complex  $[\text{Gd}_2(\text{NO}_3)_2(\text{saph})_2(\text{DMF})_4]$  (**3**). Unprimed and primed atoms are related by the symmetry operation  $-x+2, -y, -z$ .

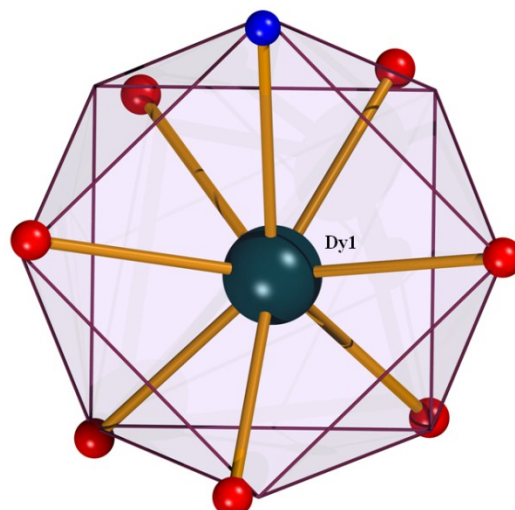

**Fig. S3** Another view (different than the one shown in Fig. 2 of the main text) of the coordination polyhedron of Dy1 in the structure of **5**. Colour scheme: Dy1, dark green; N, blue; O, red.

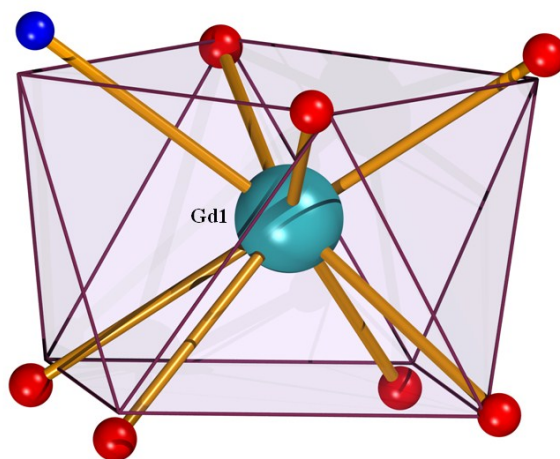

**Fig. S4** The square antiprismatic coordination geometry of Gd1 in the structure of **3**. The plotted polyhedron is the ideal, best-fit polyhedron using the program SHAPE. Colour scheme: Gd1, sky blue; N, blue; O, red.

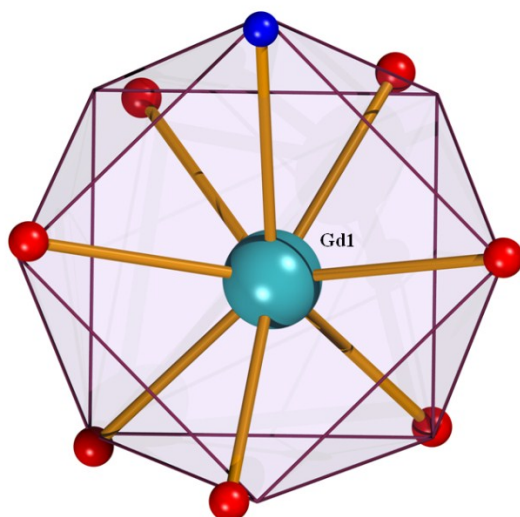

**Fig. S5** Another view (different than the one shown in Fig. S4) of the coordination polyhedron of Gd1 in the structure of **3**. Colour scheme: Gd1, sky blue; N, blue; O, red.

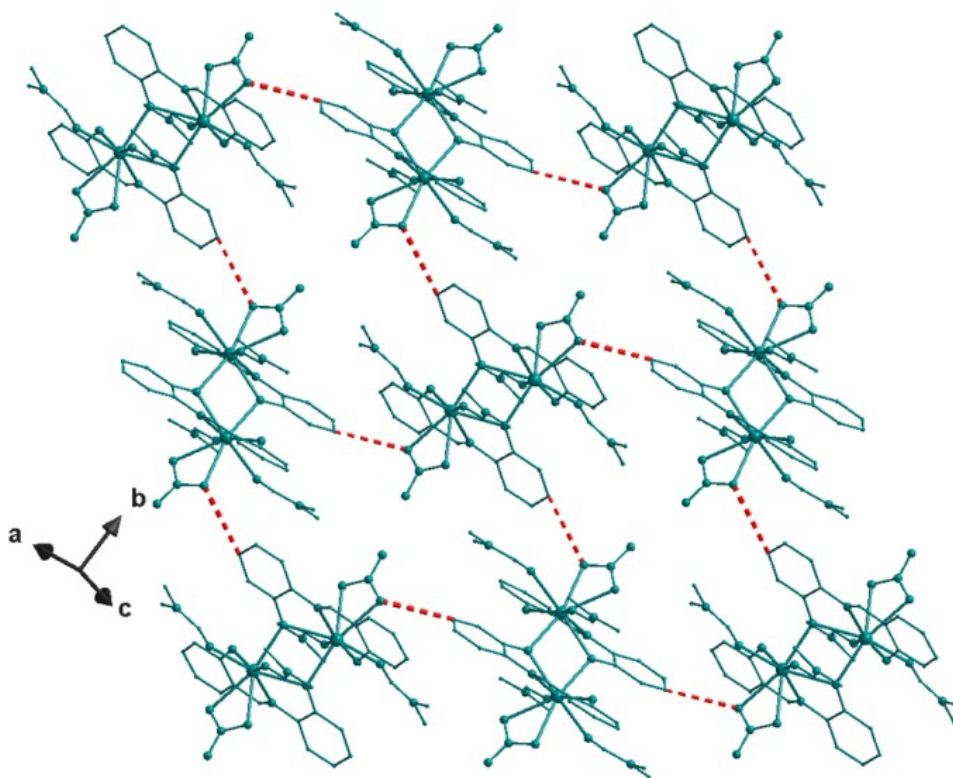

**Fig. S6** A small portion of one 2D layer in the crystal structure of complex **3**, resulting from the intermolecular C3-H3 $\cdots$ O4 (and symmetry equivalent) hydrogen bonding interaction.

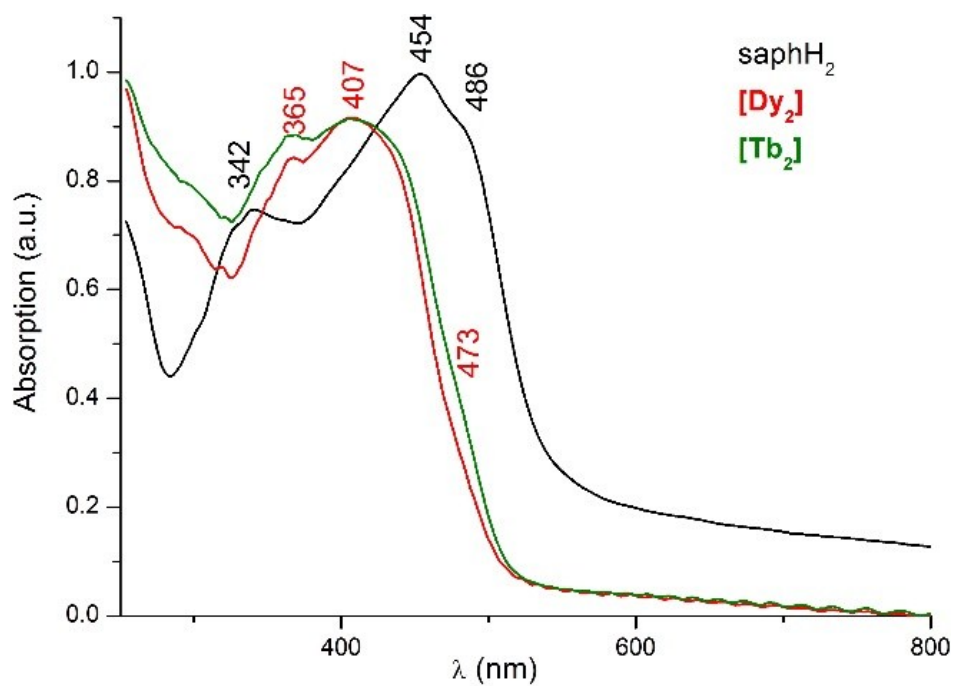

**Fig. S7** Solid-state UV-VIS absorption spectra of free H<sub>2</sub>saph and complexes **4** and **5**.

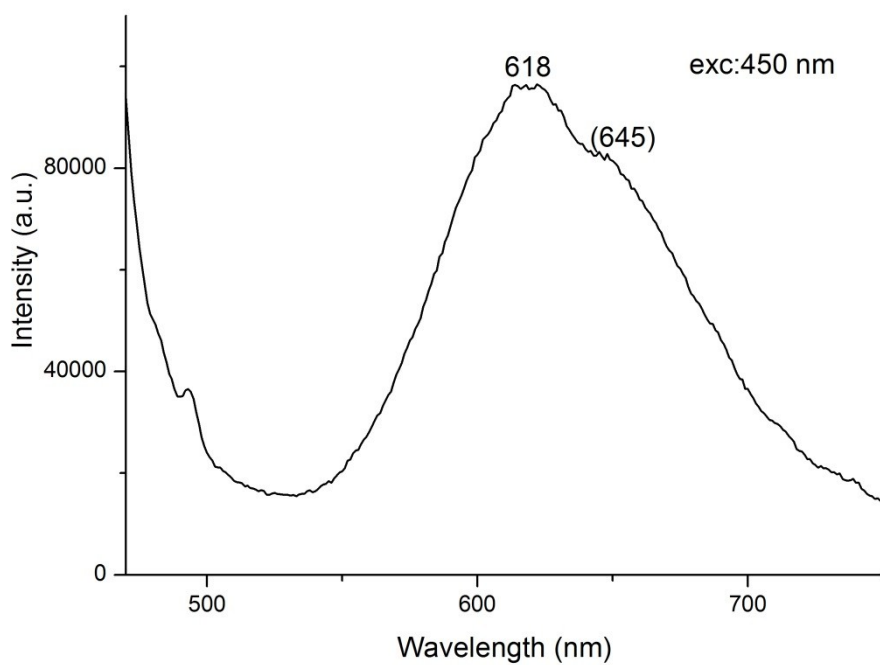

**Fig. S8** Solid-state, room-temperature emission spectrum of the free ligand H<sub>2</sub>saph upon maximum excitation at 450 nm.

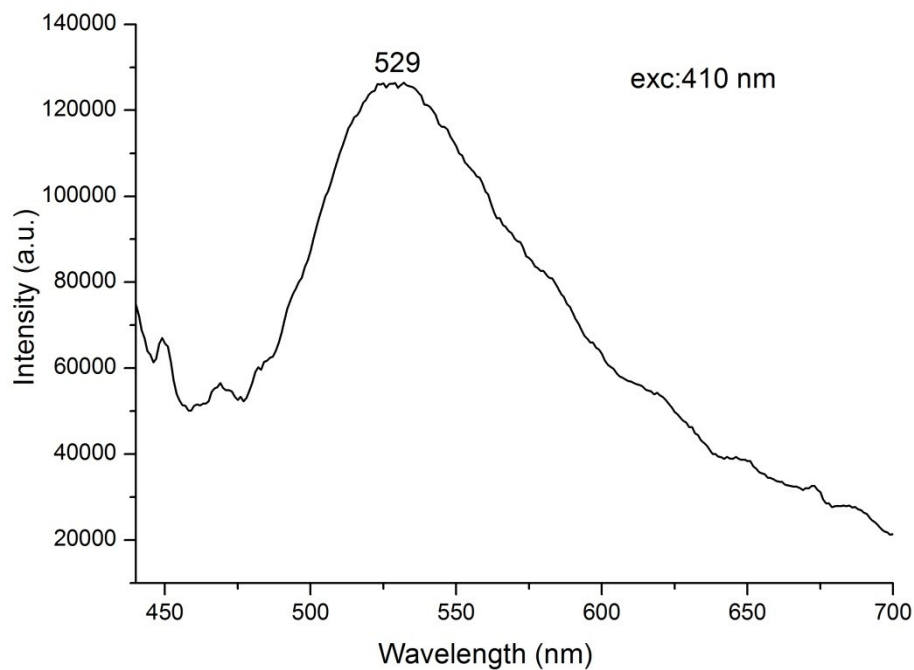

**Fig. S9** Solid-state, room-temperature emission spectrum for the  $\text{Sm}^{\text{III}}_2$  complex **1**; the excitation wavelength was 410 nm.

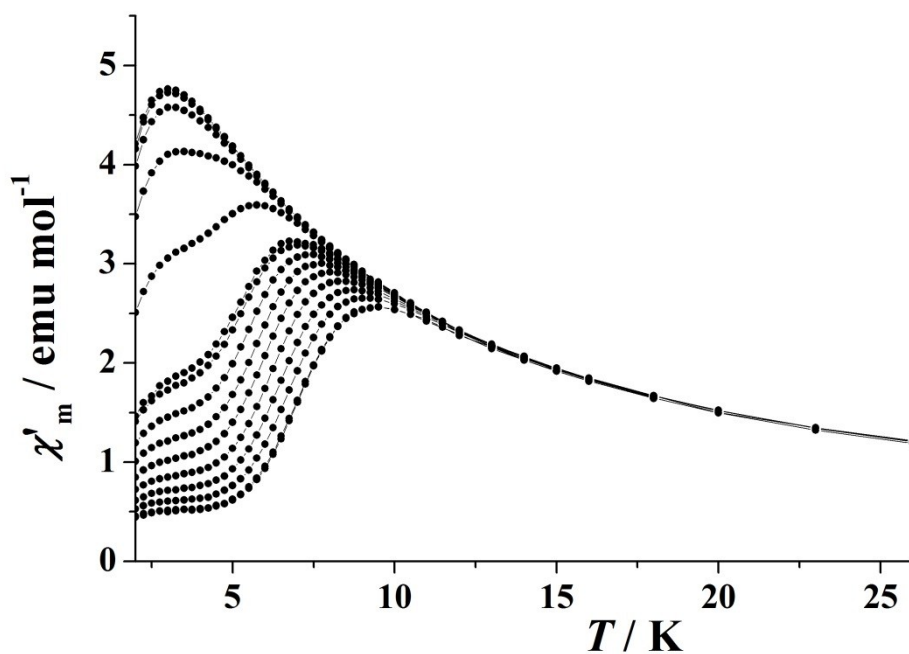

**Fig. S10** Temperature dependence of the in-phase ( $\chi'_M$ ) component of the ac susceptibility for **5** under a zero external dc field at various frequencies.

**Table S1.** Important crystallographic data for complexes [Gd<sub>2</sub>(NO<sub>3</sub>)<sub>2</sub>(saph)<sub>2</sub>(DMF)<sub>4</sub>] (**3**) and [Dy<sub>2</sub>(NO<sub>3</sub>)<sub>2</sub>(saph)<sub>2</sub>(DMF)<sub>4</sub>] (**5**).

|                                                                  | Complex <b>3</b>                                                               | Complex <b>5</b>                                                               |
|------------------------------------------------------------------|--------------------------------------------------------------------------------|--------------------------------------------------------------------------------|
| Formula                                                          | C <sub>38</sub> H <sub>46</sub> Gd <sub>2</sub> N <sub>8</sub> O <sub>14</sub> | C <sub>38</sub> H <sub>46</sub> Dy <sub>2</sub> N <sub>8</sub> O <sub>14</sub> |
| <i>F</i> <sub>w</sub>                                            | 1153.33                                                                        | 1163.83                                                                        |
| Space group                                                      | <i>P2</i> <sub>1</sub> / <i>n</i>                                              | <i>P2</i> <sub>1</sub> / <i>n</i>                                              |
| <i>a</i> (Å)                                                     | 12.3327(2)                                                                     | 12.3132(2)                                                                     |
| <i>b</i> (Å)                                                     | 14.0747(3)                                                                     | 14.0547(2)                                                                     |
| <i>c</i> (Å)                                                     | 12.6772(2)                                                                     | 12.6042(2)                                                                     |
| <i>α</i> (°)                                                     | 90.00                                                                          | 90.00                                                                          |
| <i>β</i> (°)                                                     | 91.259(1)                                                                      | 91.412(1)                                                                      |
| <i>γ</i> (°)                                                     | 90.00                                                                          | 90.00                                                                          |
| <i>V</i> (Å <sup>3</sup> )                                       | 2199.97(7)                                                                     | 2180.60(6)                                                                     |
| <i>Z</i>                                                         | 2                                                                              | 2                                                                              |
| <i>T</i> (°C)                                                    | -113                                                                           | -113                                                                           |
| Radiation                                                        | Cu Kα (1.54178 Å)                                                              | Cu Kα (1.54178 Å)                                                              |
| <i>ρ</i> <sub>calcd</sub> (g cm <sup>-3</sup> )                  | 1.741                                                                          | 1.773                                                                          |
| <i>μ</i> (mm <sup>-1</sup> )                                     | 19.917                                                                         | 18.755                                                                         |
| Reflections with <i>I</i> > 2σ( <i>I</i> )                       | 3444                                                                           | 3516                                                                           |
| <i>R</i> <sub>1</sub> [ <i>I</i> > 2σ( <i>I</i> )] <sup>a</sup>  | 0.0355                                                                         | 0.0364                                                                         |
| <i>wR</i> <sub>2</sub> [ <i>I</i> > 2σ( <i>I</i> )] <sup>a</sup> | 0.0892                                                                         | 0.0973                                                                         |

<sup>a</sup>  $w = 1/[\sigma^2(F_o^2) + (\alpha P)^2 + bP]$  and  $P = [\max(F_o^2, 0) + 2F_c^2]/3$ ,

$R_1 = \Sigma(|F_o| - |F_c|)/\Sigma(|F_o|)$  and  $wR_2 = \{\Sigma[w(F_o^2 - F_c^2)^2]/\Sigma[w(F_o^2)^2]\}^{1/2}$ .

**Table S2.** Continuous Shape Measures (CShM) values for the possible coordination polyhedra of the 8-coordinate Gd1/Gd1' and Dy1/Dy1' ions in the molecular structures of the centrosymmetric complexes **3** and **5**, respectively.<sup>a,b</sup>

| Ideal polyhedron                       | Gd1/Gd1' (complex <b>3</b> ) | Dy1/Dy1' (complex <b>5</b> ) |
|----------------------------------------|------------------------------|------------------------------|
| Octagon                                | 33.06374                     | 32.95967                     |
| Heptagonal pyramid                     | 21.27010                     | 21.45814                     |
| Hexagonal bipyramid                    | 16.00208                     | 16.02660                     |
| Cube                                   | 9.21212                      | 9.17978                      |
| Square antiprism                       | <b>1.68114</b>               | <b>1.63634</b>               |
| Triangular dodecahedron                | 1.92532                      | 1.82971                      |
| Johnson gyrobifastigium                | 16.85700                     | 16.81023                     |
| Johnson elongated triangular bipyramid | 26.65569                     | 26.72859                     |
| Biaugmented trigonal prism J50         | 3.38231                      | 3.27316                      |
| Biaugmented trigonal prism             | 2.77170                      | 2.66138                      |
| Snub diphenoïd                         | 5.36155                      | 5.26433                      |
| Triakis tetrahedron                    | 9.96685                      | 9.92229                      |
| Elongated trigonal bipyramid           | 23.10065                     | 23.18327                     |

<sup>a</sup>The smallest values (in bold) define the best polyhedron (square antiprism for **3** and **5**). <sup>b</sup>Chemically significant distortions give CShM values of 0.1 or higher, while values larger than about 3 indicate important distortions.
